# Supplementary material for: Fabrication of hydrophilic composites by bridging the secondary structures between rice proteins and pea proteins toward enhanced nutritional properties
Source: Royal Society of Chemistry journal article supplement (doi:10.1039/d0fo01182g), 2020-01-01
Supplement: d0fo01182g1.pdf [file d0fo01182g1.pdf]

**Supporting Information for:**

**Fabrication of Hydrophilic Composites by Bridging Secondary Structures between Rice Proteins and Pea Proteins Toward Enhanced Nutritional Properties**

Ren Wang, Lulu Li, Wei Feng, and Tao Wang\*

*Key Laboratory of Carbohydrate Chemistry and Biotechnology, Ministry of Education,*

*National Engineering Laboratory for Cereal Fermentation Technology, Jiangnan*

*University, Jiangsu Provincial Research Center for Bioactive Product Processing*

*Technology, and School of Food Science and Technology, Jiangnan University, Wuxi,*

*Jiangsu 21422, People's Republic of China*

## Supporting figures

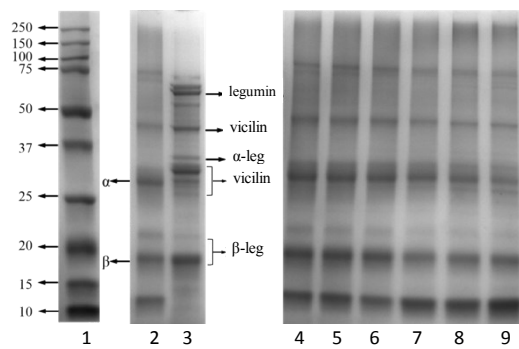

**Fig. S1** SDS-PAGE. Lane 1 is marker, and lanes 2-9 are RPs, PPs, and sediments of composites prepared at PPs/PPs = 1:0.01, 1:0.05, 1:0.1, 1:0.2, 1:0.5, and 1:1, respectively.

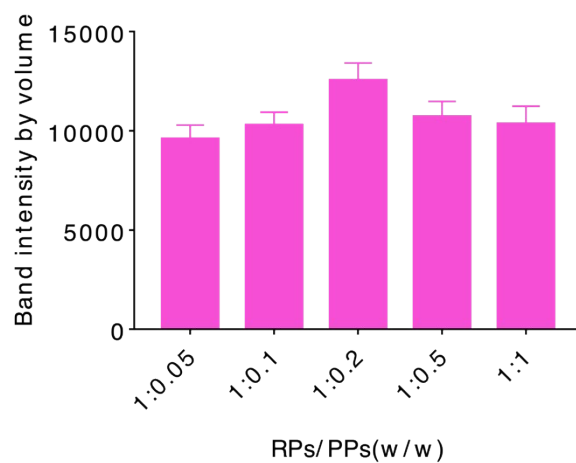

**Fig. S2** Band illumination of  $\alpha$ -glutelin in composites.

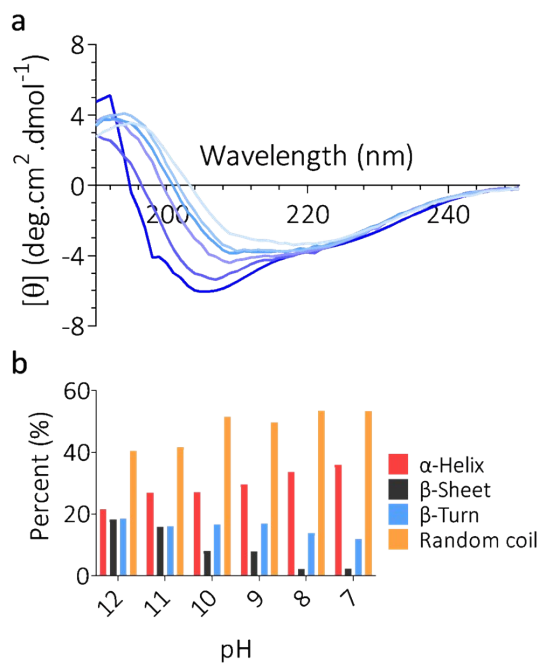

**Fig. S3** (a) Representative far-UV CD spectra of a composite prepared at RPs/PPs = 1:1 (w/w). Colored curves in the arrow direction represent composites at pH 7–12, respectively. (b) Analysis of secondary structures.
